# Supplementary material for: Urease and Dental Plaque Microbial Profiles in Children
Source: PubMed Central journal article supplement (PMC4587978; doi:10.1371/journal.pone.0139315), 2015-09-29
Supplement: pone.0139315.s004.pdf [file pone.0139315.s004.pdf]

**S2 Table: OTUs whose frequencies in the dental plaque of children correlated significantly (P<0.05) with different caries outcomes. \* Bonferroni P<0.05.**

| <b>Species</b>                                                      | <b>r</b> | <b>Probability</b> |
|---------------------------------------------------------------------|----------|--------------------|
| <b>Longitudinal correlation by overall caries experience (dmfs)</b> |          |                    |
| <i>Streptococcus peroris</i>                                        | -0.7907  | <0.0001*           |
| <i>Neisseria flavescens</i>                                         | 0.6903   | 0.0008             |
| <i>Leptotrichia hofstadii</i>                                       | 0.7286   | 0.0014             |
| <i>Actinomyces massiliensis</i>                                     | -0.5011  | 0.0025             |
| <i>Sneathia amnionii</i> [NV]                                       | -0.7078  | 0.0046             |
| <i>GN02[G-1] sp. oral taxon 871</i>                                 | 0.4876   | 0.0046             |
| <i>Aggregatibacter aphrophilus</i>                                  | -0.5411  | 0.0063             |
| <i>Capnocytophaga leadbetteri</i>                                   | -0.6626  | 0.0071             |
| <i>Fusobacterium nucleatum subsp. Nucleatum</i>                     | -0.7849  | 0.0072             |
| <i>Veillonella dispar</i>                                           | 0.6082   | 0.0074             |
| <i>Actinomyces massiliensis</i>                                     | -0.4907  | 0.0080             |
| <i>Propionibacterium propionicum</i>                                | -0.3037  | 0.0090             |
| <i>Actinomyces sp. oral taxon 897</i>                               | 0.5400   | 0.0095             |
| <i>Leptotrichia sp. oral taxon 879</i>                              | -0.6608  | 0.0101             |
| <i>Prevotella sp. oral taxon 472</i>                                | 0.6048   | 0.0131             |
| <i>Haemophilus haemolyticus</i>                                     | -0.7445  | 0.0135             |
| <i>Capnocytophaga leadbetteri</i>                                   | -0.2861  | 0.0141             |
| <i>Veillonella dispar</i>                                           | -0.7337  | 0.0157             |
| <i>Selenomonas sp. oral taxon 442</i>                               | -0.2889  | 0.0161             |
| <i>Capnocytophaga sp. oral taxon 326</i>                            | -0.2859  | 0.0164             |
| <i>Leptotrichia sp. oral taxon 225</i>                              | 0.4053   | 0.0174             |
| <i>Oribacterium sp. oral taxon 372</i>                              | -0.3340  | 0.0178             |
| <i>Eikenella corrodens</i>                                          | -0.7198  | 0.0189             |
| <i>Capnocytophaga leadbetteri</i>                                   | -0.6537  | 0.0211             |
| <i>Alloprevotella sp. oral taxon 914</i>                            | -0.3626  | 0.0215             |
| <i>GN02[G-2] sp. oral taxon 873</i>                                 | 0.5676   | 0.0218             |
| <i>Porphyromonas sp. oral taxon 279</i>                             | 0.2630   | 0.0246             |
| <i>Veillonella dispar</i>                                           | -0.3788  | 0.0248             |
| <i>Fusobacterium periodonticum</i>                                  | -0.6907  | 0.0270             |

|                                               |         |        |
|-----------------------------------------------|---------|--------|
| <i>Capnocytophaga sp. oral taxon 903</i>      | 0.6888  | 0.0276 |
| <i>Veillonella atypica</i>                    | -0.2844 | 0.0276 |
| <i>Campylobacter rectus</i>                   | 0.3299  | 0.0288 |
| <i>Porphyromonas sp. oral taxon 279</i>       | -0.6834 | 0.0294 |
| <i>Capnocytophaga gingivalis</i>              | 0.4853  | 0.0301 |
| <i>Leptotrichia wadei</i>                     | 0.6230  | 0.0305 |
| <i>Leptotrichia sp. oral taxon 909</i>        | 0.5963  | 0.0315 |
| <i>Neisseria flavescens</i>                   | -0.4579 | 0.0321 |
| <i>Veillonella parvula</i>                    | 0.3784  | 0.0327 |
| <i>Veillonella dispar</i>                     | -0.6720 | 0.0333 |
| <i>Neisseria elongata</i>                     | -0.4335 | 0.0343 |
| <i>Corynebacterium matruchotii</i>            | 0.6677  | 0.0349 |
| <i>Neisseria flavescens</i>                   | 0.6592  | 0.0381 |
| <i>Porphyromonas sp. oral taxon 279</i>       | -0.4430 | 0.0389 |
| <i>Selenomonas sp. oral taxon 442</i>         | -0.5991 | 0.0395 |
| <i>Leptotrichia sp. oral taxon 909</i>        | -0.5991 | 0.0395 |
| <i>Neisseria pharyngis</i>                    | -0.5380 | 0.0472 |
| <i>Capnocytophaga granulosa</i>               | -0.5370 | 0.0477 |
| <i>Granulicatella adiacens</i>                | -0.2311 | 0.0492 |
| <b>Longitudinal correlation enamel caries</b> |         |        |
| <i>Actinomyces massiliensis</i>               | -0.5482 | 0.0008 |
| <i>Corynebacterium matruchotii</i>            | -0.7296 | 0.0020 |
| <i>Actinomyces dentalis</i>                   | -0.3648 | 0.0033 |
| <i>Kingella oralis</i>                        | -0.3281 | 0.0046 |
| <i>Prevotella melaninogenica</i>              | -0.3216 | 0.0055 |
| <i>Aggregatibacter sp. oral taxon 898</i>     | -0.5492 | 0.0066 |
| <i>Fusobacterium periodonticum</i>            | 0.5607  | 0.0066 |
| <i>Granulicatella adiacens</i>                | -0.3778 | 0.0096 |
| <i>Streptococcus peroris</i>                  | -0.7629 | 0.0103 |
| <i>Porphyromonas sp. oral taxon 279</i>       | 0.2867  | 0.0139 |
| <i>Prevotella salivae</i>                     | -0.6382 | 0.0141 |
| <i>Prevotella sp. oral taxon 472</i>          | -0.6076 | 0.0163 |
| <i>Gemella morbillorum</i>                    | -0.4908 | 0.0174 |

|                                                   |         |        |
|---------------------------------------------------|---------|--------|
| <i>Kingella oralis</i>                            | -0.3256 | 0.0185 |
| <i>Veillonella dispar</i>                         | -0.3933 | 0.0194 |
| <i>Eikenella corrodens</i>                        | 0.6174  | 0.0246 |
| <i>Leptotrichia sp. oral taxon 219</i>            | -0.5880 | 0.0270 |
| <i>Leptotrichia hongkongensis</i>                 | -0.6301 | 0.0281 |
| <i>Veillonella sp. oral taxon 780</i>             | -0.5367 | 0.0321 |
| <i>Actinomyces massiliensis</i>                   | -0.4047 | 0.0327 |
| <i>Actinomyces sp. oral taxon 180</i>             | -0.2499 | 0.0330 |
| <i>Selenomonas sp. oral taxon 442</i>             | -0.2541 | 0.0351 |
| <i>Streptococcus peroris</i>                      | -0.5226 | 0.0378 |
| <i>Veillonella dispar</i>                         | -0.5922 | 0.0425 |
| <i>Streptococcus sanguinis</i>                    | 0.5109  | 0.0432 |
| <i>Selenomonas sp. oral taxon 442</i>             | -0.5901 | 0.0434 |
| <i>Cardiobacterium valvarum</i>                   | 0.3328  | 0.0442 |
| <i>Capnocytophaga gingivalis</i>                  | 0.5387  | 0.0469 |
| <i>Prevotella maculosa</i>                        | -0.2594 | 0.0472 |
| <b>Longitudinal correlation by dentine caries</b> |         |        |
| <i>Veillonella dispar</i>                         | -0.8529 | 0.0017 |
| <i>Porphyromonas sp. oral taxon 279</i>           | 0.3472  | 0.0026 |
| <i>Leptotrichia sp. oral taxon 217</i>            | 0.7430  | 0.0056 |
| <i>Neisseria elongata</i>                         | 0.6553  | 0.0059 |
| <i>Veillonella dispar</i>                         | 0.6188  | 0.0062 |
| <i>Capnocytophaga sp. oral taxon 336</i>          | 0.4459  | 0.0093 |
| <i>Porphyromonas sp. oral taxon 284</i>           | -0.4007 | 0.0104 |
| <i>Veillonella dispar</i>                         | -0.4269 | 0.0105 |
| <i>Porphyromonas sp. oral taxon 279</i>           | -0.5327 | 0.0107 |
| <i>Corynebacterium matruchotii</i>                | 0.7478  | 0.0129 |
| <i>Capnocytophaga leadbetteri</i>                 | -0.6125 | 0.0152 |
| <i>Neisseria oralis</i>                           | -0.6718 | 0.0167 |
| <i>Actinomyces massiliensis</i>                   | -0.4067 | 0.0170 |
| <i>Actinomyces massiliensis</i>                   | -0.4451 | 0.0176 |
| <i>Capnocytophaga sp. oral taxon 326</i>          | -0.2815 | 0.0182 |
| <i>Neisseria elongata</i>                         | 0.5362  | 0.0218 |

|                                         |         |        |
|-----------------------------------------|---------|--------|
| <i>Capnocytophaga leadbetteri</i>       | -0.2646 | 0.0237 |
| <i>Eikenella sp. oral taxon 011</i>     | -0.5250 | 0.0253 |
| <i>Veillonella parvula</i>              | 0.3911  | 0.0269 |
| <i>Capnocytophaga leadbetteri</i>       | -0.6238 | 0.0302 |
| <i>Streptococcus peroris</i>            | -0.5279 | 0.0356 |
| <i>Veillonella atypica</i>              | -0.2686 | 0.0380 |
| <i>Kingella oralis</i>                  | -0.6558 | 0.0395 |
| <i>Leptotrichia sp. oral taxon 909</i>  | 0.5727  | 0.0408 |
| <i>Fusobacterium sp. oral taxon 203</i> | 0.5157  | 0.0409 |
| <i>Capnocytophaga leadbetteri</i>       | -0.5507 | 0.0413 |
| <i>Lautropia mirabilis</i>              | 0.3738  | 0.0418 |
| <i>Capnocytophaga gingivalis</i>        | 0.4565  | 0.0431 |
| <i>Veillonella dispar</i>               | -0.6433 | 0.0448 |
| <i>Neisseria flavescens</i>             | 0.4505  | 0.0462 |
| <i>Tannerella sp. oral taxon 286</i>    | 0.3666  | 0.0463 |
| <i>GN02[G-1] sp. oral taxon 871</i>     | 0.3525  | 0.0478 |
| <i>Fusobacterium sp. oral taxon 370</i> | 0.2586  | 0.0480 |
| <i>Leptotrichia hongkogenesis</i>       | 0.3180  | 0.0485 |
